# Supplementary material
Source: PubMed Central journal article supplement (PMC4855937)
Supplement: JCI83532.sd.pdf [file JCI83532.sd.pdf]

**Supplemental Table S1. Primer sequences of the selected gene.**

The sequences of primers of indicated genes for detection by q-PCR are shown.

|                                | 5'                      | 3'                       | Accession number |
|--------------------------------|-------------------------|--------------------------|------------------|
| <b>Ucp1</b>                    | GGCCTCTACGACTCAGTCCA    | TAAGCCGGCTGAGATCTTGT     | NM_009463        |
| <b>Ppara</b>                   | CCTTCCCTGTGAACTGACG     | CCACAGAGCGCTAAGCTGT      | NM_011144        |
| <b>Ppar<math>\gamma</math></b> | GAAAGACAACGGACAAATCACC  | GGGGGTGATATGTTTGAACCTG   | NM_011146        |
| <b>Pdk4</b>                    | CGCTTAGTGAACACTCCTTCG   | CTTCTGGGCTCTTCTCATGG     | NM_013743        |
| <b>Fabp3</b>                   | CTTTGTCCGGTACCTGGAAGC   | TGGTCATGCTAGCCACCTG      | NM_010174        |
| <b>Elovl3</b>                  | ACTTCGAGACGTTTCAGGACTTA | GACGACCACTATGAGAAATGAGC  | NM_007703        |
| <b>Elovl6</b>                  | CAGCAAAGCACCCGAACTA     | AGGAGCACAGTGATGTGGTG     | NM_130450        |
| <b>Cpt1b</b>                   | GAGTGACTGGTGGGAAGAATATG | GCTGCTTGACATTTGTGTT      | NM_009948        |
| <b>Cox7a1</b>                  | CGAAGAGGGGAGGTGACTC     | AGCCTGGGAGACCCGTAG       | NM_009944        |
| <b>Cox8b</b>                   | CCAGCCAAAACCTCCACTT     | GAACCATGAAGCCAACGAC      | NM_007751        |
| <b>Cidea</b>                   | GTCTGCAAGCAACCAAAGAA    | ATTGAGACAGCCGAGGAAGT     | NM_007702        |
| <b>36B4</b>                    | GATGCCCAGGGAAGACAG      | ACAATGAAGCATTTTGGATAATCA | NM_007475        |

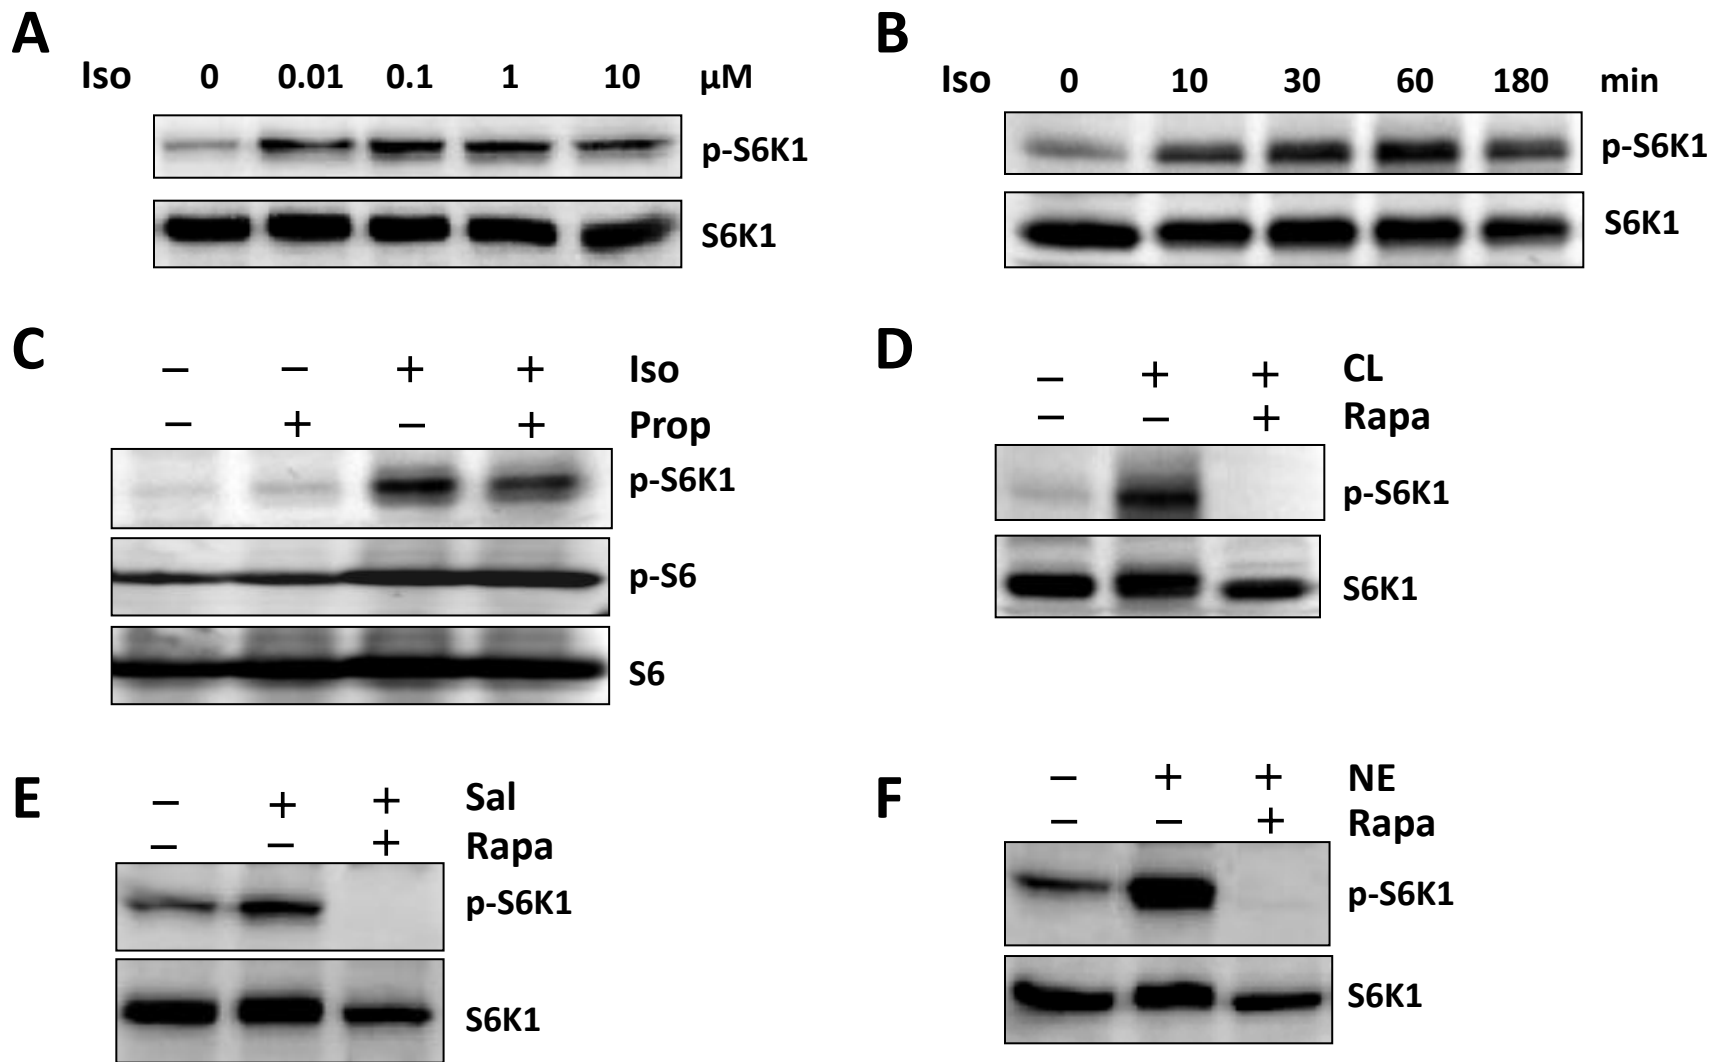

**Fig S1. All three  $\beta$ AR subtypes in adipocytes activate mTOR-S6K1 signaling.**

(A) 3T3-L1 adipocytes were treated with the indicated concentrations of isoproterenol (Iso) for 1 hr or (B) the indicated times with 1  $\mu$ M Iso, followed by immunoblotting of lysates for phospho-S6K1 and total S6K1. (C) Iso (1  $\mu$ M) was added in the presence or absence of propranolol (Prop, 0.5  $\mu$ M), and lysates were assayed for phosphorylated S6K1 and S6. 3T3-L1 adipocytes were treated with the following regimens and lysates were assayed for S6K1 phosphorylation: (D)  $\beta_3$ AR-selective agonist CL316,243 (5  $\mu$ M) pretreated or not with rapamycin (Rapa, 100 nM); (E)  $\beta_2$ AR-selective agonist salbutamol (Sal, 5  $\mu$ M) pretreated or not with rapamycin (Rapa, 100 nM); (F) norepinephrine (NE, 1  $\mu$ M) in the presence or absence of Rapa (100 nM).

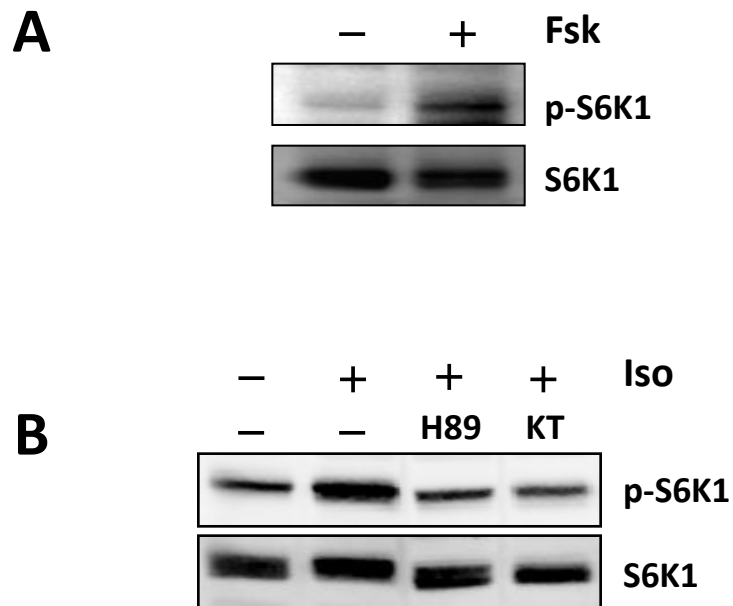

**Fig S2. PKA mediates S6K1 phosphorylation.**

**(A)** 3T3-L1 adipocytes were treated or not with the adenylyl cyclase activator forskolin (Fsk, 10  $\mu$ M) for 1 hr, followed by measurement of phospho- and total S6K1.

**(B)** 3T3-L1 adipocytes were treated with the PKA inhibitor H89 (20  $\mu$ M) or KT 5720 (KT, 10  $\mu$ M) for 30 min as indicated. Following the addition of Iso for 1 hr, cells were lysed and processed for Western blotting to measure phosphorylation of S6K1 or total S6K1.

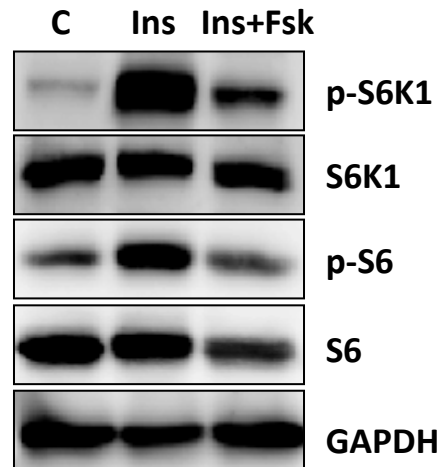

**Fig S3. Fsk suppresses insulin mediated mTORC1 action in 3T3-L1 adipocytes**

3T3-L1 adipocytes were maintained in DMEM without FBS overnight, treated with Ins (10 nM) alone or Fsk (20  $\mu$ M) 30 min prior to 30 min Ins (10 nM) treatment. Phosphorylated S6K1 and S6 and their respective total proteins were measured by Western blotting. GAPDH served as loading control.

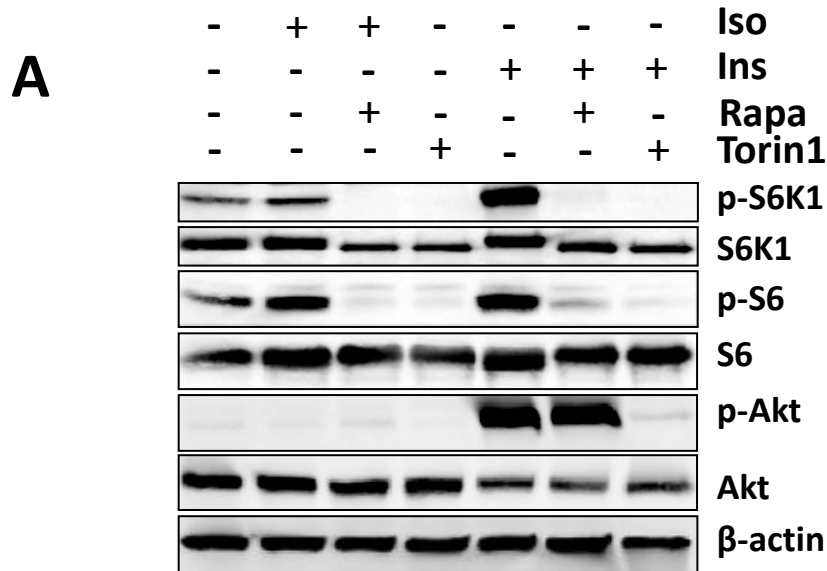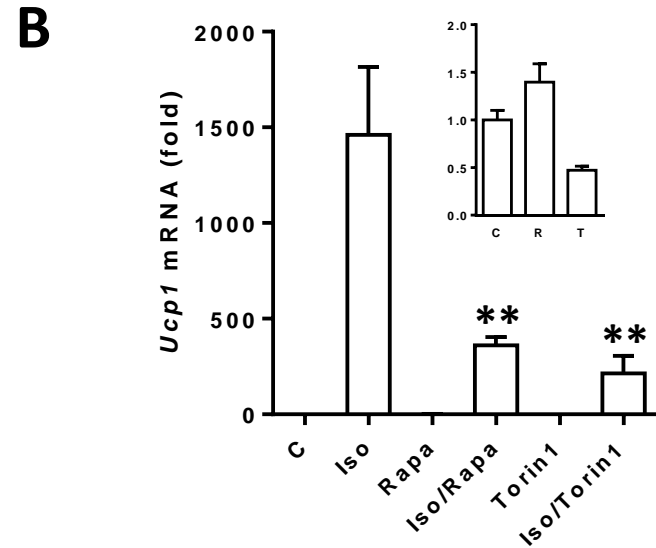

**Fig S4. Both rapamycin and torin1 block  $\beta$ AR activation in HIB-1B cells.**

HIB-1B adipocytes were pre-treated with Rapa (100 nM) or torin1 (250 nM), (A) followed by Iso (1  $\mu$ M) or insulin (Ins, 10 nM) for 30 min for cell lysate processed for Western blotting to detect p-S6K1, p-S6, p-Akt (S473), and respective total proteins and  $\beta$ -actin as loading control. (B) followed by Iso (100 nM) treatment for 6 hours. qPCR was performed to detect UCP1 gene expression level normalized by internal control 36B4. Compared with Iso treatment group, \*\*:  $p < 0.01$ . The inset bar graph shows an expanded scale for the following groups: C (untreated control); R (Rapa alone); T (Torin1 alone).

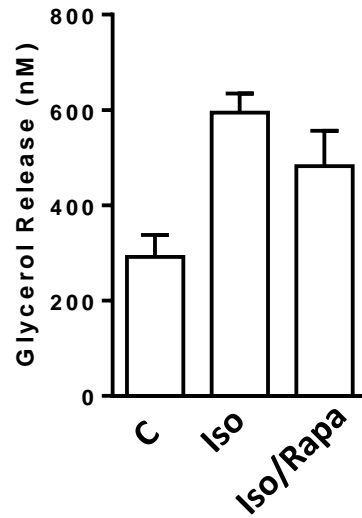

**Fig S5. mTORC1 inhibition does not affect Iso-mediated lipolysis.**

3T3-L1 adipocytes were pretreated with Rapa (100nM) for 30 minutes, followed by treatment of Iso (1  $\mu$ M) for 1 hr, medium glycerol was measured by Sigma Aldrich free glycerol reagent (F-6428) according to protocol.

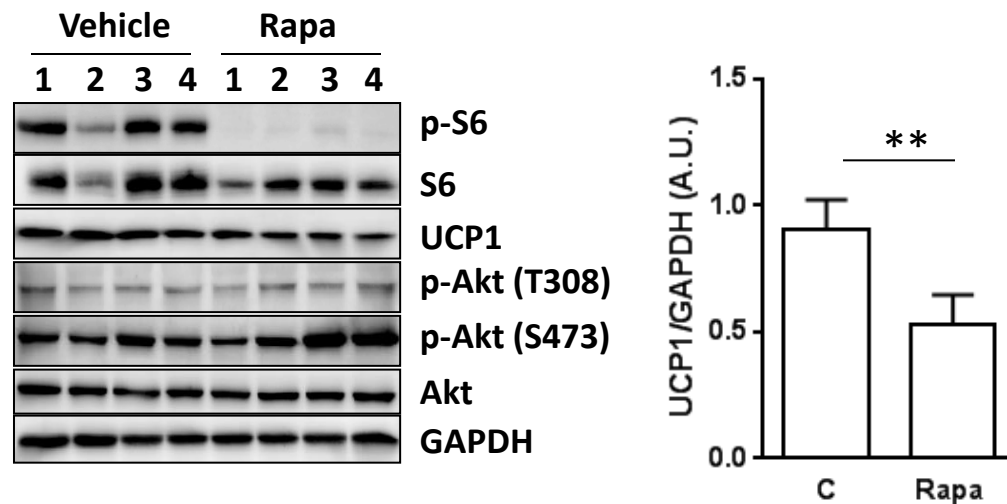

**Fig S6. Rapamycin modestly suppresses UCP1 in iBAT after acute 10 hour cold exposure.**

Rapamycin (4mg/kg bw) was intraperitoneally administered one day before cold exposure. Mouse was singly caged with free access to water gel, placed in cold room (4°C) for up to 10 hrs. The lysates from iBAT of vehicle (n=4) or rapamycin (n=4) groups were analysed with immunoblotting for phospho- and total S6, UCP1, phospho-Akt (T308 and S473) and total Akt, and internal control GAPDH. Band quantification of UCP1 to GAPDH was shown in the right panel. \*\*: p<0.01

**A**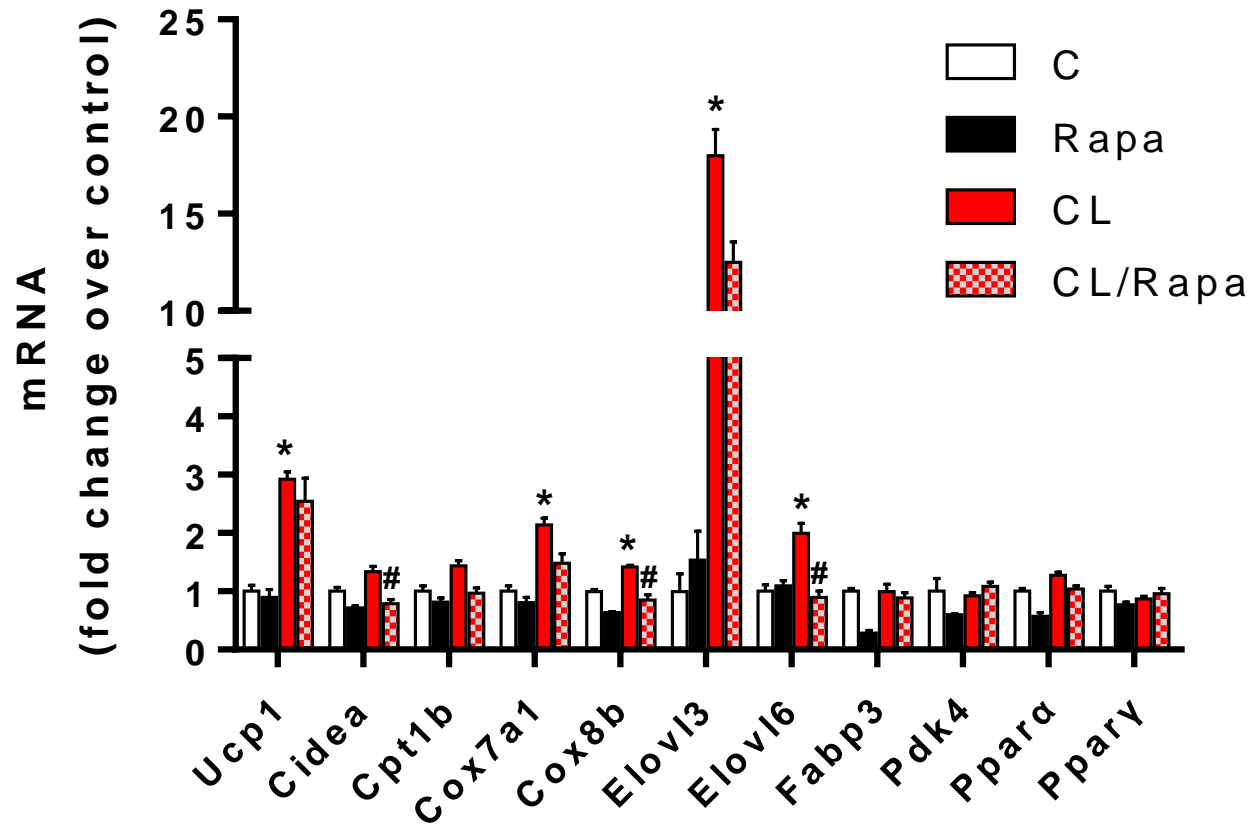**Fig S7.**



**B**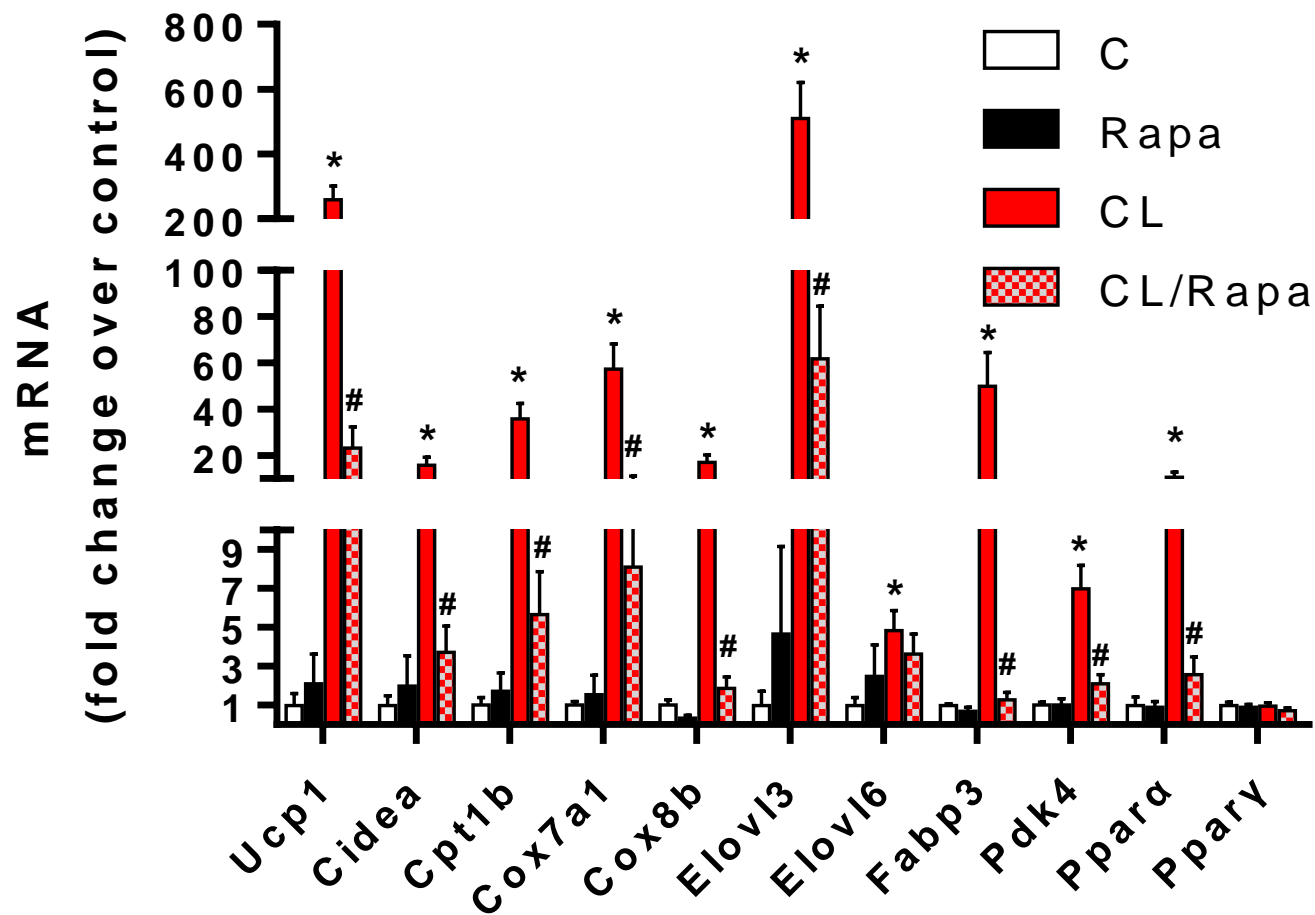

Fig S7.

C

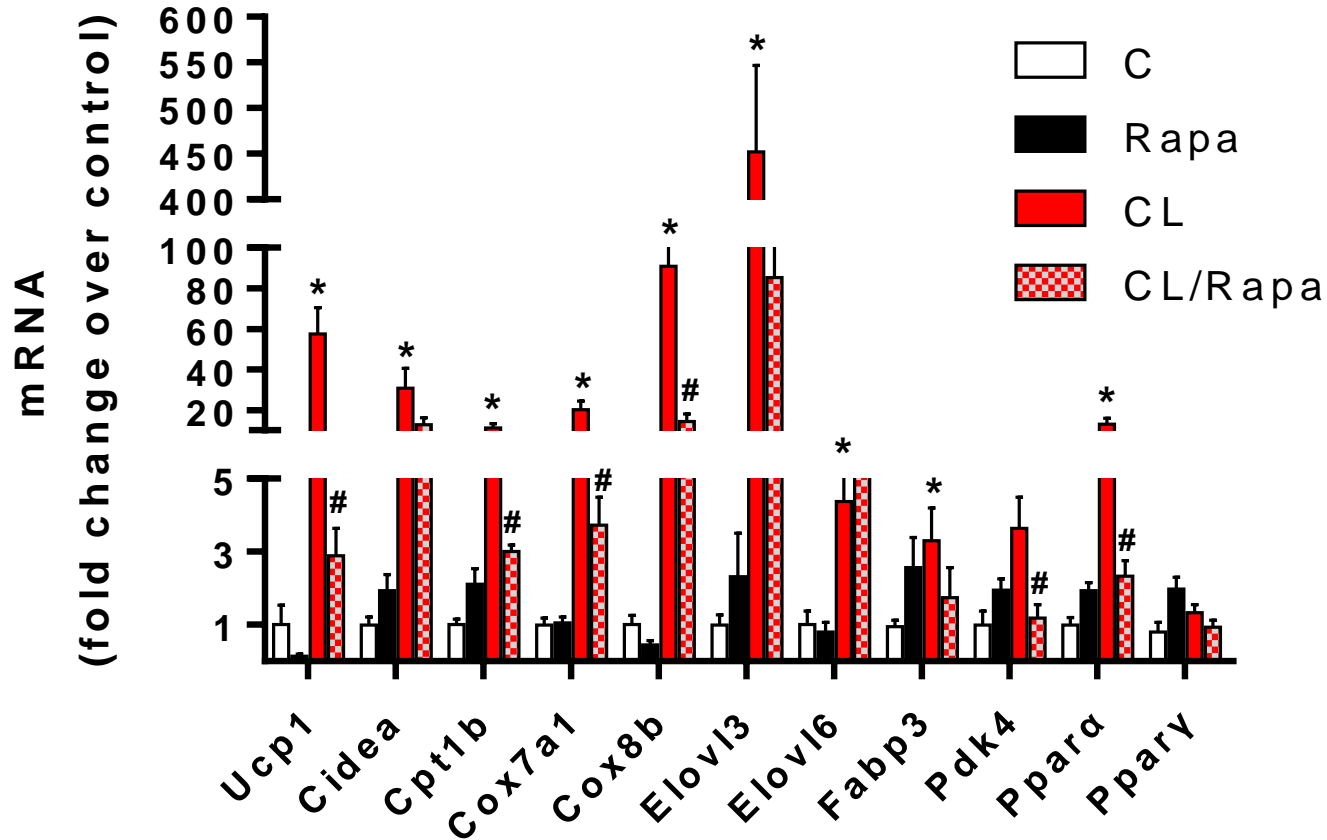

**Fig S7. mTORC1 inhibition blocks gene expressions of adipose browning**

Gene expressions of browning markers in (A) iBAT, (B) iWAT, and (C) gWAT after 1 week of  $\beta$ 3AR agonist CL and/or Rapamycin treatment (as described in Fig4). The gene transcripts include Ucp1, Cidea, Cpt1b, Cox7a1, Cox8b, Elov13, Elov16, Fabp3, Pdk4, and nuclear receptors Ppara and Ppar $\gamma$ . The relative gene expression was normalized to internal control 36B4 and each gene expression was presented finally as fold change over vehicle control. C vs CL, \*:p<0.05; CL vs CL/Rapa, #: p<0.05.

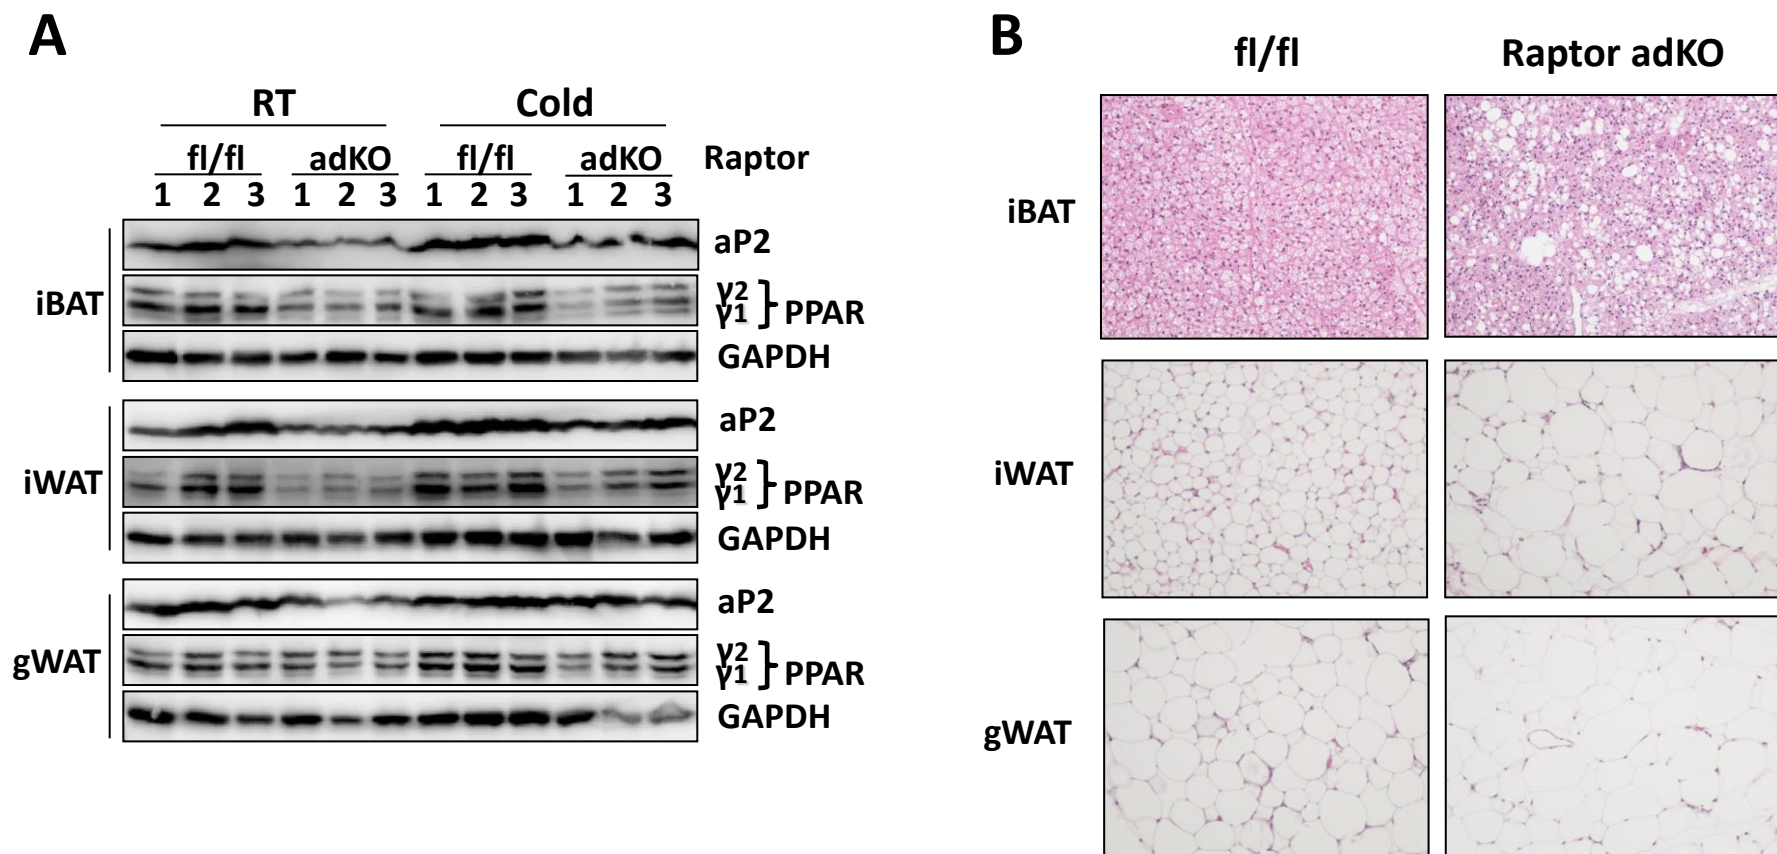

**Fig S8. Adipogenic markers and adipose histology of Raptor fl/fl and adKO mice.**

(A) The adipogenic markers aP2 and PPAR $\gamma$  in iBAT, iWAT, and gWAT were measured by Western blotting with respective antibodies from Cell Signaling Technologies in Raptor fl/fl and adipose knockout (KO) mice. GAPDH served as loading control. (B) H&E staining of iBAT, iWAT, and gWAT: 20X magnification.
